# Supplementary material for: Protocol of mixed-methods assessment of demographic, epidemiological and clinical profile of decentralised patients with cancer at Nelson Mandela Academic Hospital and Rob Ferreira Hospital, South Africa
Source: PubMed Central journal article supplement (PMC9024264; doi:10.1136/bmjopen-2021-054983), 2022-04-21
Supplement: bmjopen-2021-054983supp002.pdf [file bmjopen-2021-054983supp002.pdf]

## Appendix C: Questionnaire validation

|                                                                                                                                                            | Relevance    |              |              |                                |                                                  |                                     | Clarity      |              |              |                                |                                                             |                                     |
|------------------------------------------------------------------------------------------------------------------------------------------------------------|--------------|--------------|--------------|--------------------------------|--------------------------------------------------|-------------------------------------|--------------|--------------|--------------|--------------------------------|-------------------------------------------------------------|-------------------------------------|
|                                                                                                                                                            | Expert<br>_1 | Expert<br>_2 | Expert<br>_3 | Experts<br>in<br>agreeme<br>nt | Item<br>Content<br>Validity<br>Index (I-<br>CVI) | Universa<br>l<br>Agreeme<br>nt (UA) | Expert<br>_1 | Expert<br>_2 | Expert<br>_3 | Experts<br>in<br>agreeme<br>nt | Item<br>Conte<br>nt<br>Validit<br>y<br>Index<br>(I-<br>CVI) | Universa<br>l<br>Agreeme<br>nt (UA) |
| <b>Survey questionnaire (patients)</b><br><b>INSTRUCTIONS:</b><br>Fill in the blank spaces with a tick where appropriate.<br>Date of Administration: _____ |              |              |              |                                |                                                  |                                     |              |              |              |                                |                                                             |                                     |
| <b>Section 1: demographic profile</b>                                                                                                                      |              |              |              |                                |                                                  |                                     |              |              |              |                                |                                                             |                                     |
| <b>Question</b>                                                                                                                                            |              |              |              |                                |                                                  |                                     |              |              |              |                                |                                                             |                                     |
| 1. Gender<br>1 Female<br>2 Male                                                                                                                            | 4            | 4            | 4            | 3                              | 1                                                | 1                                   | 4            | 3            | 4            | 3                              | 1                                                           | 1                                   |
| 2. Date of Birth<br>Dd/Mm/Yy:<br>_____                                                                                                                     | 4            | 3            | 4            | 3                              | 1                                                | 1                                   | 4            | 4            | 4            | 3                              | 1                                                           | 1                                   |
| 3. Ethnicity<br>1 African<br>2 White<br>3 Indian<br>4 Coloured<br>5 Other:<br>specify                                                                      | 4            | 4            | 4            | 3                              | 1                                                | 1                                   | 4            | 4            | 4            | 3                              | 1                                                           | 1                                   |
| 4. Marital status<br>1 Never Married<br>2 Married<br>3 Divorced/<br>Separated<br>4 Widowed<br>5 Cohabiting                                                 | 3            | 3            | 4            | 3                              | 1                                                | 1                                   | 4            | 3            | 4            | 3                              | 1                                                           | 1                                   |
| 5. What is the highest standard/grade you have attended in education? -----<br>-----                                                                       | 4            | 4            | 3            | 3                              | 1                                                | 1                                   | 4            | 3            | 4            | 3                              | 1                                                           | 1                                   |
| 6. Are you currently studying?<br>1 Yes<br>2 No                                                                                                            | 3            | 3            | 3            | 3                              | 1                                                | 1                                   | 4            | 3            | 3            | 3                              | 1                                                           | 1                                   |
| 7. What is your current level of study? -----<br>-----                                                                                                     | 3            | 3            | 3            | 3                              | 1                                                | 1                                   | 4            | 3            | 4            | 3                              | 1                                                           | 1                                   |
| 8. Are you employed?<br>a)<br>1 Yes<br>2 No<br>b) If employed, what type of employment? --<br>-----                                                        | 4            | 4            | 4            | 3                              | 1                                                | 1                                   | 4            | 4            | 4            | 3                              | 1                                                           | 1                                   |

|                                                                                                                                                                                                               |   |   |   |   |   |   |   |   |   |   |   |   |
|---------------------------------------------------------------------------------------------------------------------------------------------------------------------------------------------------------------|---|---|---|---|---|---|---|---|---|---|---|---|
| 9. Source of income (tick all appropriate)<br>1 Job<br>2 Old Age Grant<br>3 Disability Grant<br>4 Other Pension<br>5 Spousal support<br>6 Support from children<br>7 Child support grant<br>8 None<br>9 Other | 4 | 4 | 4 | 3 | 1 | 1 | 4 | 4 | 4 | 3 | 1 | 1 |
| 10. What is your residential area? Name of town/administrative area: -----<br>-                                                                                                                               | 3 | 4 | 3 | 3 | 1 | 1 | 4 | 3 | 3 | 3 | 1 | 1 |
| 11. Referring facility:<br>1 Clinic<br>2 Community Health Centre<br>3 District Hospital<br>4 Regional Hospital<br>5 Private General practitioner<br>6 Private hospital<br>7 Other (specify):                  | 4 | 4 | 4 | 3 | 1 | 1 | 4 | 4 | 4 | 3 | 1 | 1 |
| <b>Section 2:<br/>Epidemiological and clinical profile of various cancers</b>                                                                                                                                 |   |   |   | 3 | 1 | 1 |   |   |   | 3 | 1 | 1 |
| 1. Do you have a family history of cancer?<br>1 Yes<br>2 No<br>3 Unsure                                                                                                                                       | 4 | 4 | 4 | 3 | 1 | 1 | 4 | 4 | 4 | 3 | 1 | 1 |
| 2. Do you smoke? (tick all appropriate)<br>1 Yes<br>2 No                                                                                                                                                      | 4 | 4 | 4 | 3 | 1 | 1 | 4 | 3 | 4 | 3 | 1 | 1 |
| 2b) If Yes, when did you start smoking? Year:                                                                                                                                                                 | 4 | 3 | 4 | 3 | 1 | 1 | 4 | 3 | 3 | 3 | 1 | 1 |
| 2c) On average, how many cigarettes do you smoke in a day?                                                                                                                                                    | 4 | 3 | 4 | 3 | 1 | 1 | 4 | 3 | 4 | 3 | 1 | 1 |
| 2d) If No, have you ever smoked?                                                                                                                                                                              | 4 | 3 | 4 | 3 | 1 | 1 | 4 | 3 | 4 | 3 | 1 | 1 |
| 2e) For how long did you smoke?                                                                                                                                                                               | 4 | 3 | 4 | 3 | 1 | 1 | 4 | 4 | 4 | 3 | 1 | 1 |

|                                                                                                                                                                                                                                                                                                                                                                                             |   |   |   |   |   |   |   |   |   |   |   |   |
|---------------------------------------------------------------------------------------------------------------------------------------------------------------------------------------------------------------------------------------------------------------------------------------------------------------------------------------------------------------------------------------------|---|---|---|---|---|---|---|---|---|---|---|---|
| 2f) How many did you smoke in a day?<br>1 Once<br>2 Twice<br>3 Three time<br>4 More than 3 times                                                                                                                                                                                                                                                                                            | 4 | 3 | 4 | 3 | 1 | 1 | 4 | 3 | 3 | 3 | 1 | 1 |
| 2g) Did you stop smoking?<br>1 Yes<br>2 No                                                                                                                                                                                                                                                                                                                                                  | 4 | 3 | 3 | 3 | 1 | 1 | 4 | 4 | 3 | 3 | 1 | 1 |
| 3. Do you drink alcohol?<br>a)<br>1 Yes<br>2 No                                                                                                                                                                                                                                                                                                                                             | 4 | 4 | 4 | 3 | 1 | 1 | 4 | 4 | 4 | 3 | 1 | 1 |
| 4. Do you exercise (physical) on a regular basis?<br>1 Yes<br>2 No                                                                                                                                                                                                                                                                                                                          | 4 | 4 | 3 | 3 | 1 | 1 | 4 | 4 | 4 | 3 | 1 | 1 |
| 4b) Did you drink alcohol before?<br>1 Yes<br>2 No                                                                                                                                                                                                                                                                                                                                          | 4 | 4 | 4 | 3 | 1 | 1 | 4 | 4 | 4 | 3 | 1 | 1 |
| 5. Have you ever worked in mines?<br>1 Yes<br>2 No                                                                                                                                                                                                                                                                                                                                          | 4 | 4 | 4 | 3 | 1 | 1 | 4 | 3 | 4 | 3 | 1 | 1 |
| 6. How long in years did you work in mines?<br>-----                                                                                                                                                                                                                                                                                                                                        | 4 | 4 | 4 | 3 | 1 | 1 | 4 | 4 | 4 | 3 | 1 | 1 |
| 7. Which mines? Gold, diamond coal, mixed? -----                                                                                                                                                                                                                                                                                                                                            | 4 | 4 | 4 | 3 | 1 | 1 | 4 | 4 | 4 | 3 | 1 | 1 |
| 8.<br>a) Please indicate if your family has a history of any cancer/s below?<br>1 Breast cancer<br>5 Oesophagus cancer<br>2 Lung cancer<br>6 Colon cancer<br>3 Cervical cancer<br>7 Ovarian cancer<br>4 Prostate Cancer<br>8 Other (specify)<br>9 No history of cancer in my family<br><br>b) If you have history of cancer in your family, indicate who in the family had these cancer(s)? | 4 | 4 | 4 | 3 | 1 | 1 | 4 | 4 | 4 | 3 | 1 | 1 |

|                                                                                                                                                                                                                                                                                                                                              |   |   |   |   |      |   |   |   |   |   |   |   |
|----------------------------------------------------------------------------------------------------------------------------------------------------------------------------------------------------------------------------------------------------------------------------------------------------------------------------------------------|---|---|---|---|------|---|---|---|---|---|---|---|
| 9. Before you were told you needed to go to hospital about cancer, how many times did you see your GP (family doctor)/ clinic about the health problem caused by cancer?<br>1x 2x 3x 4x 5x<br>Other<br>1 I visited my local clinic<br>2 I saw my local private doctor<br>3 I saw my traditional healer/doctor/Isangoma<br>4 Other (specify): | 4 | 4 | 4 | 3 | 1    | 1 | 4 | 4 | 4 | 3 | 1 | 1 |
| 10. How do you feel about the length of time you had to wait before your first appointment with a hospital doctor or clinic doctor?<br>1 I was seen as soon as I thought was necessary<br>2 I should have been seen a bit sooner                                                                                                             | 4 | 2 | 4 | 2 | 0,67 | 0 | 4 | 3 | 4 | 3 | 1 | 1 |
| 11. How long was it from the time you identified symptoms? ----                                                                                                                                                                                                                                                                              | 4 | 4 | 4 | 3 | 1    | 1 | 3 | 4 | 3 | 3 | 1 | 1 |
| 12. Did your symptoms get better or worse or were the same while you were waiting for your first appointment with a hospital doctor? ----                                                                                                                                                                                                    | 4 | 4 | 4 | 3 | 1    | 1 | 4 | 4 | 4 | 3 | 1 | 1 |
| 13. What type of cancer(s) were you diagnosed with? ---                                                                                                                                                                                                                                                                                      | 4 | 4 | 4 | 3 | 1    | 1 | 4 | 4 | 4 | 3 | 1 | 1 |
| 14. When was your cancer(s) diagnosed? -----                                                                                                                                                                                                                                                                                                 | 4 | 4 | 4 | 3 | 1    | 1 | 4 | 4 | 4 | 3 | 1 | 1 |
| 15. What health problems or symptoms did you notice at first? -----                                                                                                                                                                                                                                                                          | 4 | 4 | 4 | 3 | 1    | 1 | 4 | 3 | 4 | 3 | 1 | 1 |

|                                                                                                                                                                                                                                                                                       |   |   |   |   |   |   |   |   |   |   |   |   |
|---------------------------------------------------------------------------------------------------------------------------------------------------------------------------------------------------------------------------------------------------------------------------------------|---|---|---|---|---|---|---|---|---|---|---|---|
| 16. Who first told you that you had cancer?<br>1 A hospital doctor<br>2 A hospital nurse<br>3 A GP (family doctor)<br>4 Another health professional<br>5 A friend or relative<br>6 Nobody – I worked it out for myself<br>7 Cannot remember                                           | 3 | 4 | 4 | 3 | 1 | 1 | 4 | 4 | 4 | 3 | 1 | 1 |
| 17. When you were first told that you had cancer, had you been told you could bring a family member or friend with you?<br>1 Yes<br>2 No<br>3 It was not necessary<br>4 I was told by phone or letter<br>5 Don't know / Can't remember<br>6 Missing                                   | 3 | 4 | 4 | 3 | 1 | 1 | 3 | 4 | 4 | 3 | 1 | 1 |
| 18. How do you feel about the way you were told you had cancer? -----                                                                                                                                                                                                                 | 4 | 4 | 4 | 3 | 1 | 1 | 4 | 4 | 4 | 3 | 1 | 1 |
| 19. Did you understand the explanation of what was found with you? -----                                                                                                                                                                                                              | 4 | 4 | 4 | 3 | 1 | 1 | 4 | 4 | 4 | 3 | 1 | 1 |
| 20. When you were told you had cancer, were you given written information about the type of cancer you had? -----                                                                                                                                                                     | 4 | 4 | 4 | 3 | 1 | 1 | 4 | 4 | 4 | 3 | 1 | 1 |
| 21. Before your cancer treatment started, were you given a choice of different types of treatment?<br>1 Yes<br>2 No, but I would have liked a choice<br>3 I was not given a choice because only one type of treatment was suitable for me<br>4 Not sure / Can't remember<br>5 Missing | 4 | 4 | 4 | 3 | 1 | 1 | 4 | 4 | 4 | 3 | 1 | 1 |

|                                                                                                                                                                                        |   |   |   |   |   |   |   |   |   |   |   |   |
|----------------------------------------------------------------------------------------------------------------------------------------------------------------------------------------|---|---|---|---|---|---|---|---|---|---|---|---|
| 22. Do you think your views were taken into account when the team of doctors and nurses caring for you were discussing which treatment you should have? -----                          | 4 | 4 | 4 | 3 | 1 | 1 | 4 | 4 | 4 | 3 | 1 | 1 |
| 23. Were the possible side effects of treatment(s) explained in a way you could understand? ----                                                                                       | 4 | 4 | 4 | 3 | 1 | 1 | 4 | 4 | 4 | 3 | 1 | 1 |
| 24. Before you started your treatment, were you given verbal/written information about the side effects of treatment(s)? --                                                            | 4 | 4 | 4 | 3 | 1 | 1 | 4 | 4 | 3 | 3 | 1 | 1 |
| 25. Were you involved as much as you wanted to be in decisions about your care and treatment? -----                                                                                    | 4 | 4 | 4 | 3 | 1 | 1 | 4 | 4 | 4 | 3 | 1 | 1 |
| 26. a) During the last 12 months, have you had an operation (such as removal of a tumour or lump) at one of the hospitals named in the covering letter?<br>1 Yes<br>2 No<br>3 Not sure | 4 | 4 | 4 | 3 | 1 | 1 | 4 | 4 | 4 | 3 | 1 | 1 |
| 26.b) Before you had your operation, did a member of staff explain what would be done during the operation? ----                                                                       | 4 | 4 | 4 | 3 | 1 | 1 |   | 4 | 4 | 3 | 1 | 1 |
| 27. The last time you went into hospital for a cancer operation, was your admission date changed to a later date by the hospital? ---                                                  | 4 | 4 | 4 | 3 | 1 | 1 | 4 | 4 | 4 | 3 | 1 | 1 |
| 28. Beforehand, were you given written/verbal information about your operation? ---                                                                                                    | 4 | 4 | 4 | 3 | 1 | 1 | 3 | 4 | 4 | 3 | 1 | 1 |

|                                                                                                                                                                                    |      |   |   |   |                |      |   |   |   |                           |    |    |
|------------------------------------------------------------------------------------------------------------------------------------------------------------------------------------|------|---|---|---|----------------|------|---|---|---|---------------------------|----|----|
| 29. After the operation, did a member of staff explain how it had gone in a way you could understand? ----                                                                         | 4    | 4 | 4 | 3 | 1              | 1    | 4 | 4 | 4 | 3                         | 1  | 1  |
| 30. As far as you know, was your doctor given enough information about your condition and the treatment you had at the hospital?<br>1 Yes<br>2 No<br>3 Don't know / Can't remember | 4    | 3 | 4 | 3 | 1              | 1    | 3 | 3 | 4 | 3                         | 1  | 1  |
| 31. Do you think the doctors and nurses at your general practice/local clinic did everything they could to support you while you were at general practice or local clinic? -----   | 4    | 4 | 4 | 3 | 1              | 1    | 4 | 3 | 4 | 3                         | 1  | 1  |
| <b>Total</b>                                                                                                                                                                       |      |   |   |   | 50,67          | 50   |   |   |   |                           | 51 | 51 |
| Average Score-Content Validity Index (S-CVI) = I-CVI/n                                                                                                                             |      |   |   |   | 0,993529<br>41 | 0,98 |   |   |   | S-CVI                     | 1  | 1  |
| n = 51                                                                                                                                                                             |      |   |   |   |                |      |   |   |   |                           |    |    |
| <b>Proportion relevance</b>                                                                                                                                                        |      |   |   |   |                |      |   |   |   | <b>Proportion Clarity</b> |    |    |
| Expert 1                                                                                                                                                                           | 1    |   |   |   |                |      |   |   |   | Expert 1                  | 1  |    |
| Expert 2                                                                                                                                                                           | 0,98 |   |   |   |                |      |   |   |   | Expert 2                  | 1  |    |
| Expert 3                                                                                                                                                                           | 1    |   |   |   |                |      |   |   |   | Expert 3                  | 1  |    |

| Likert Scale:                                        |                                                |
|------------------------------------------------------|------------------------------------------------|
| Relevance                                            | Clarity                                        |
| 1 = Item is not relevant to the measured domain      | 1 = Item is not clear                          |
| 2 = Item is somewhat relevant to the measured domain | 2 = Item needs some revision                   |
| 3 = Item is quiet relevant to the measured domain    | 3 = Item is clear but need some minor revision |
| 4 = Item is highly relevant to the measured domain   | 4 = Item is very clea                          |
