# Supplementary material for: Protocol of mixed-methods assessment of demographic, epidemiological and clinical profile of decentralised patients with cancer at Nelson Mandela Academic Hospital and Rob Ferreira Hospital, South Africa
Source: PubMed Central journal article supplement (PMC9024264; doi:10.1136/bmjopen-2021-054983), 2022-04-21
Supplement: bmjopen-2021-054983supp003.pdf [file bmjopen-2021-054983supp003.pdf]

## Appendix B

### Document review template

| ## | Date of birth | Province | Site | Child | Patient Classification | Referred patient | Referral Type | Internal Referral Department | Referring Hospital_Mpumalanga | - |
|----|---------------|----------|------|-------|------------------------|------------------|---------------|------------------------------|-------------------------------|---|
| 1. |               |          |      |       |                        |                  |               |                              |                               |   |
| 2. |               |          |      |       |                        |                  |               |                              |                               |   |
| 3. |               |          |      |       |                        |                  |               |                              |                               |   |
| 4. |               |          |      |       |                        |                  |               |                              |                               |   |
| 5. |               |          |      |       |                        |                  |               |                              |                               |   |

| ##  | Referring Hospital_EC | Referral Hospital | Gender | Race | Citizenship | Medical Aid | Postal code | Employed | Source of income | Specify Occupation | - |
|-----|-----------------------|-------------------|--------|------|-------------|-------------|-------------|----------|------------------|--------------------|---|
| 6.  |                       |                   |        |      |             |             |             |          |                  |                    |   |
| 7.  |                       |                   |        |      |             |             |             |          |                  |                    |   |
| 8.  |                       |                   |        |      |             |             |             |          |                  |                    |   |
| 9.  |                       |                   |        |      |             |             |             |          |                  |                    |   |
| 10. |                       |                   |        |      |             |             |             |          |                  |                    |   |

| ##  | Previous work in mine | Number of Years worked in mines | Marital Status | Date of 1st oncology visit | Date of diagnosis | Cancer diagnosis 1 | ICD10_Cancer diagnosis1 | Cancer diagnosis1 Stage | Cancer diagnosis 2 | ICD10_Cancer diagnosis2 | - |
|-----|-----------------------|---------------------------------|----------------|----------------------------|-------------------|--------------------|-------------------------|-------------------------|--------------------|-------------------------|---|
| 11. |                       |                                 |                |                            |                   |                    |                         |                         |                    |                         |   |
| 12. |                       |                                 |                |                            |                   |                    |                         |                         |                    |                         |   |
| 13. |                       |                                 |                |                            |                   |                    |                         |                         |                    |                         |   |
| 14. |                       |                                 |                |                            |                   |                    |                         |                         |                    |                         |   |
| 15. |                       |                                 |                |                            |                   |                    |                         |                         |                    |                         |   |

| ##  | Cancer diagnosis2_Stage | Cancer diagnosis3 | ICD10_Cancer diagnosis3 | Cancer diagnosis3_Stage | Chemotherapy | Onco_Drug1 | Onco_Drug2 | Neupogen | Hormonal Therapy | Blood Transfusion | - |
|-----|-------------------------|-------------------|-------------------------|-------------------------|--------------|------------|------------|----------|------------------|-------------------|---|
| 16. |                         |                   |                         |                         |              |            |            |          |                  |                   |   |
| 17. |                         |                   |                         |                         |              |            |            |          |                  |                   |   |
| 18. |                         |                   |                         |                         |              |            |            |          |                  |                   |   |
| 19. |                         |                   |                         |                         |              |            |            |          |                  |                   |   |
| 20. |                         |                   |                         |                         |              |            |            |          |                  |                   |   |

| ##  | Radiotherapy | PET_Bone Scan | Palliative Care | Social support | Psychological support | HIV | Hypertension | Diabetes Mellitus | COPD | Asthma | - |
|-----|--------------|---------------|-----------------|----------------|-----------------------|-----|--------------|-------------------|------|--------|---|
| 21. |              |               |                 |                |                       |     |              |                   |      |        |   |
| 22. |              |               |                 |                |                       |     |              |                   |      |        |   |
| 23. |              |               |                 |                |                       |     |              |                   |      |        |   |
| 24. |              |               |                 |                |                       |     |              |                   |      |        |   |
| 25. |              |               |                 |                |                       |     |              |                   |      |        |   |

| ##  | Other Chronic Disease1_Name | Other Chronic Disease2_Name | Family history of cancer | Previous Smoker | Current Smoker | Number of years of smoking | Number of cigarettes smoked in a day | Weight in Kg | Height in Centimetres | Date_of_Current_Visit1 | -<br>-<br>- |
|-----|-----------------------------|-----------------------------|--------------------------|-----------------|----------------|----------------------------|--------------------------------------|--------------|-----------------------|------------------------|-------------|
| 26. |                             |                             |                          |                 |                |                            |                                      |              |                       |                        |             |
| 27. |                             |                             |                          |                 |                |                            |                                      |              |                       |                        |             |
| 28. |                             |                             |                          |                 |                |                            |                                      |              |                       |                        |             |
| 29. |                             |                             |                          |                 |                |                            |                                      |              |                       |                        |             |
| 30. |                             |                             |                          |                 |                |                            |                                      |              |                       |                        |             |

| ##  | Follow-up Date1 | RIP Date | Date_of_Current_Visit2 | Follow-up Date2 | --- |
|-----|-----------------|----------|------------------------|-----------------|-----|
| 31. |                 |          |                        |                 |     |
| 32. |                 |          |                        |                 |     |
| 33. |                 |          |                        |                 |     |
| 34. |                 |          |                        |                 |     |
| 35. |                 |          |                        |                 |     |
